# Supplementary material for: Associations between trajectories of obesity prevalence in English primary school children and the UK soft drinks industry levy: An interrupted time series analysis of surveillance data
Source: PubMed Central journal article supplement (PMC9879401; doi:10.1371/journal.pmed.1004160), 2023-01-26

Year 6 – ALL

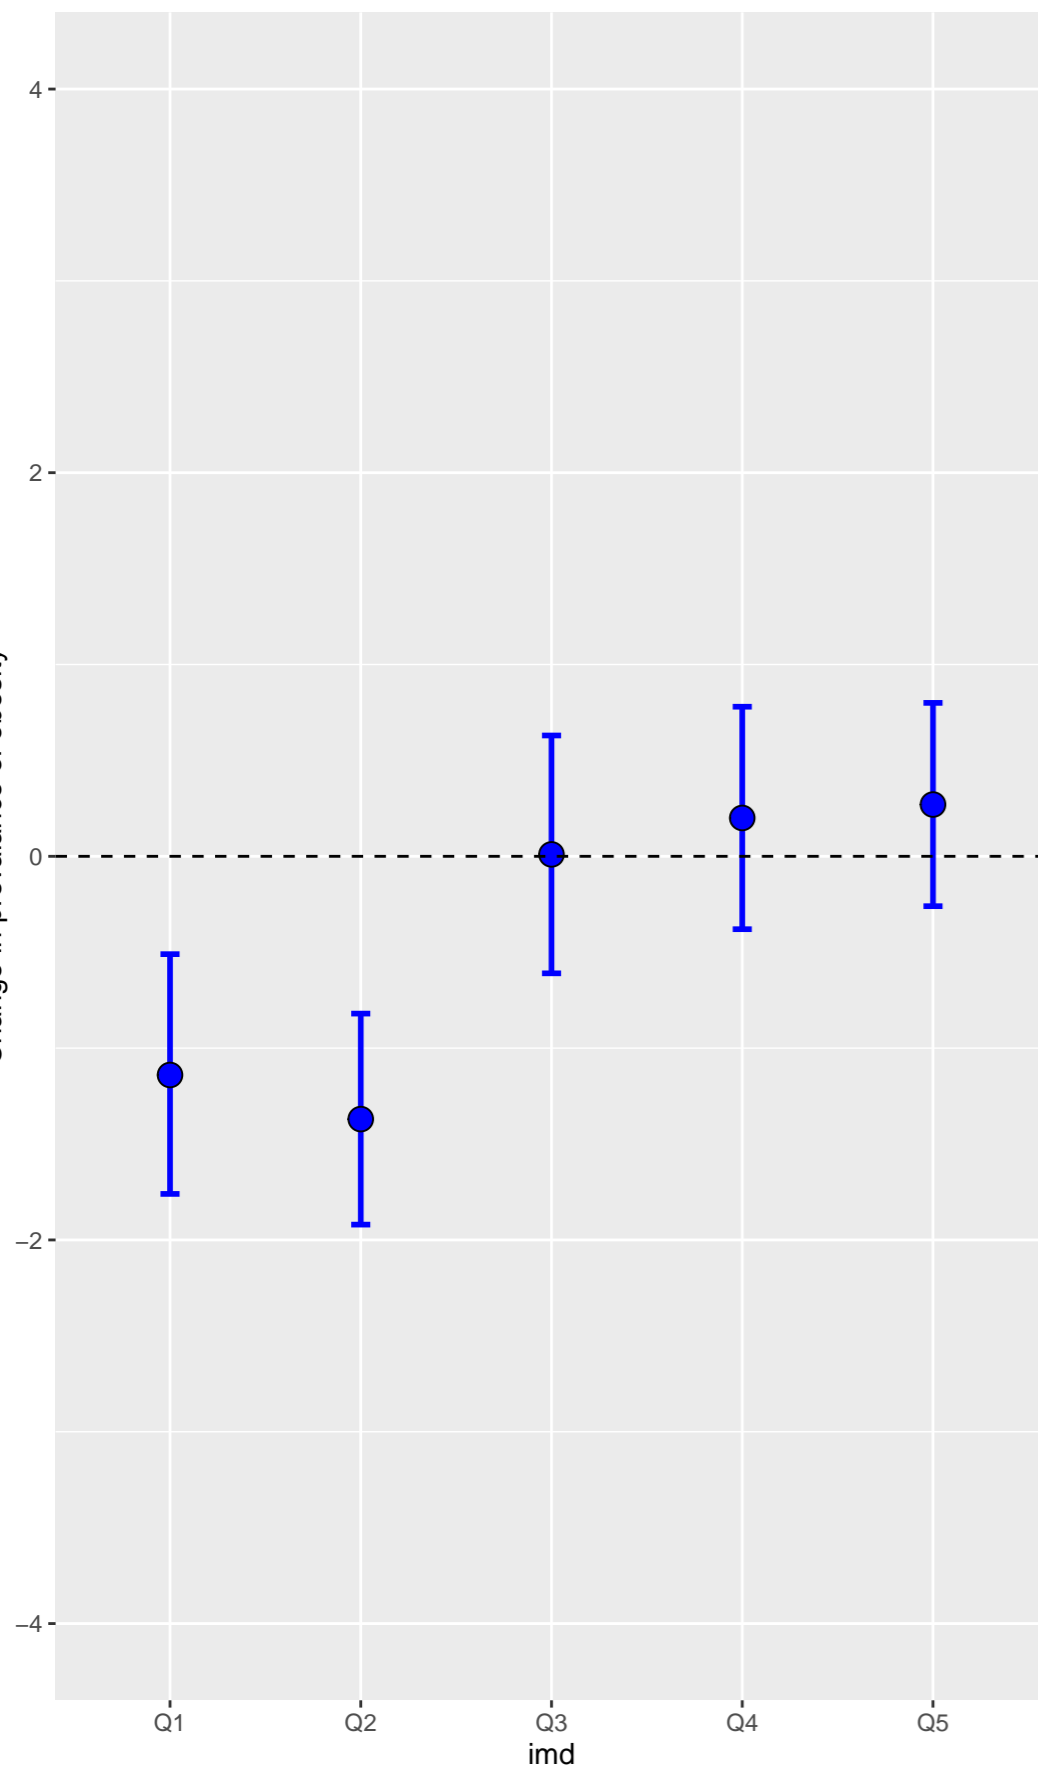

Year 6 – GIRLS

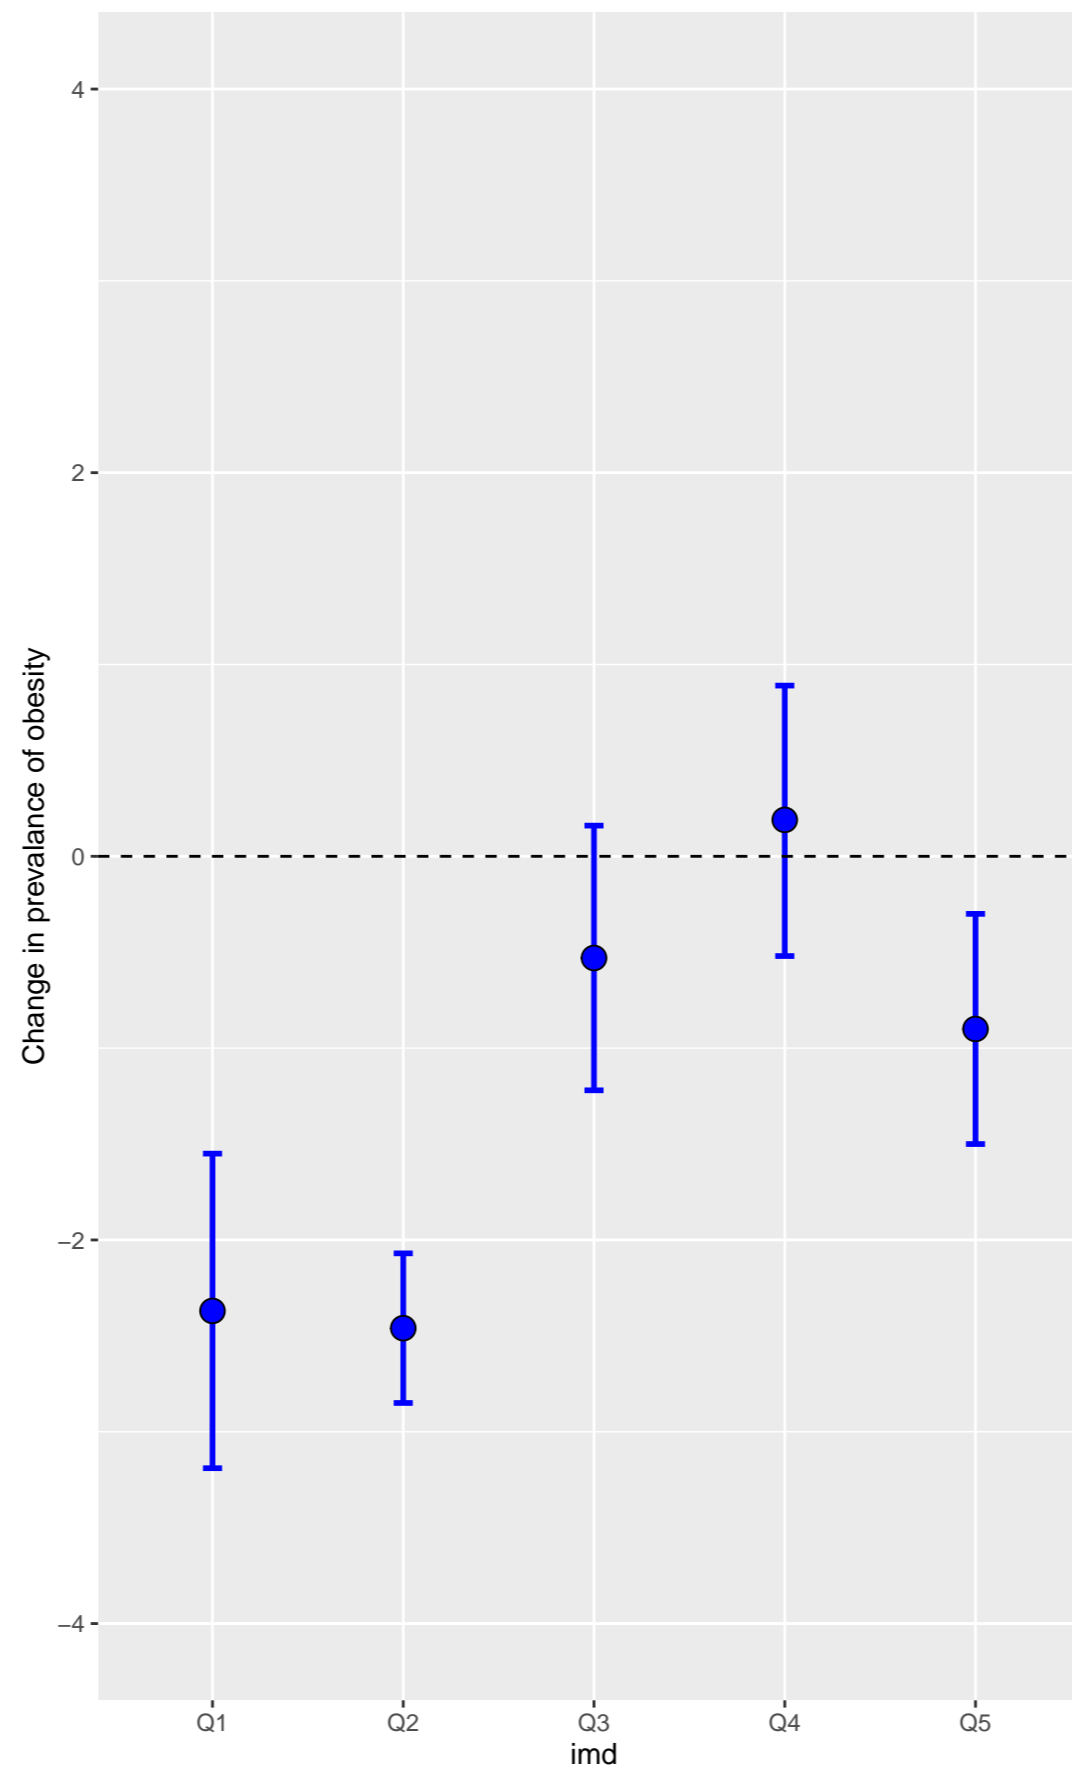

Year 6 – BOYS

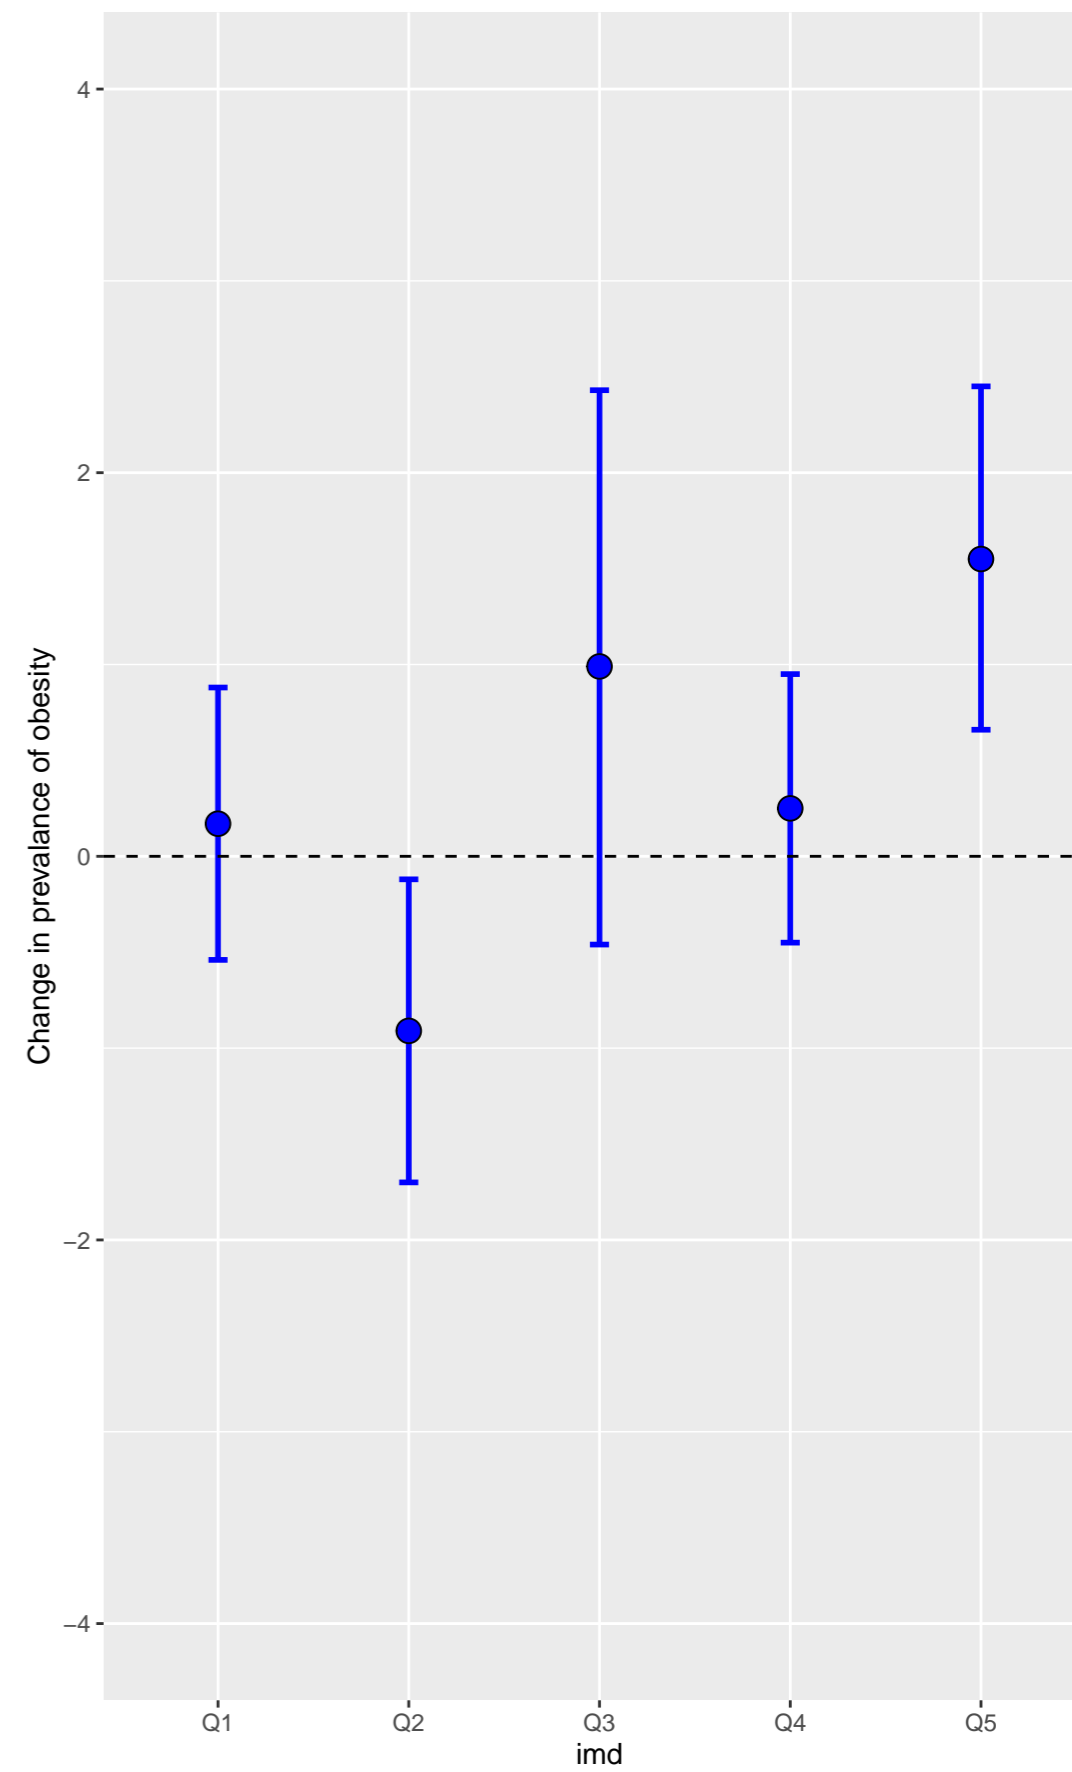

Supplement: pmed.1004160.s009.pdf [file pmed.1004160.s009.pdf]
